# Supplementary material for: ADP-ribosylating adjuvant reveals plasticity in cDC1 cells that drive mucosal Th17 cell development and protection against influenza virus infection
Source: Mucosal Immunol. 2022 Apr 13;15(4):745–61. doi: 10.1038/s41385-022-00510-1 (PMC9259495; doi:10.1038/s41385-022-00510-1)
Supplement: Supplementary file 3 — Supplemenatry table [file 41385_2022_510_MOESM3_ESM.xlsx]

## Sheet: modules_genes
Module_1	H2-Ab1	Ifi27l2a	Ccl9	H2-Eb1	Isg15	H2-DMb2	H2-Aa	H2-DMa	Ltb	Lgals3	Ccnd2	Cd8a	Cd74	Fabp5	H2-Oa	Rnase6	Lgals1	Ccnd1	Gpr183	Lst1	Fgl2	S100a6	S100a4	Emp3	Napsa	Ifitm2	Gngt2	Gm42418	Ctsc	Flna	Tmem119	Kctd14	Gpx1	Lad1	Siglecg	Nabp1	Lilr4b	Alcam	H2-Eb2	Mcemp1	Gch1	Atp2b4	Cadm3	Eva1b	Tyrobp	Sirpa	Col27a1	Il6ra	Hn1
Module_2	Asprv1	Mfge8	Cpne8	Oasl1	Itgb8	Laptm4b	Lrmp	Kcnq1ot1	Csf1	Zmynd15	Arg2	Gclc	Mospd1	Pygl	Creg1	Atxn1	Inpp5b	Pdgfa	Wdr90	Eps8l2	Rasd1	Rnaset2b	Epsti1	Aire	Serpinc1	Ccl5	Smagp	Rnf19a	Dapk2	Art2b	Icos	Rab20	Tuba1c	Cnga2	Gal3st2	Mab21l3	Kdm2b	Gm12216	Fbxo2	Insm1	Gm10116	Tlr12	AW112010	Hist3h2ba	Irf1	Aplp1	Gm16152	Tor1aip2	Gbp4
Module_3	Il12b	Il1b	Rrad	Cmc2	Nr4a2	Ehd4	Ptafr	Tspan13	Nr4a3	Btg2	Nfe2l2	Runx3	Hspa2	Ccr7	Bhlhe40	Lmnb1	Nrip1	Pmaip1	Sema7a	Specc1	Kdm6b	P2rx4	Hsd17b11	Edil3	Cd83	Chpt1	Wnt11	Gprc5a	Ifrd1	Adam19	Ggta1	Pde4b	Tgif1	Gns	Tob2	Pik3r6	Rel	Tnfrsf1a	Bbx	Hvcn1	Malt1	Jak2	Efnb2	Mmp25	Dennd4b	Stx12	Itga4	Abtb2	Gjb2
Module_4	Cxcl1	Fos	Rgs2	Plk2	Jun	Rgs1	Tnfsf9	Trim43b	Crispld2	Ier2	Ccrl2	Fosb	Gadd45g	Nfkbia	Cdkn1a	Zfp36	Dnajc1	Tnf	Klf6	Nol4l	Slc1a3	Tnfaip3	Pim1	Pdcd4	Dusp1	Map3k8	Cdk5r1	Tnfaip2	Nupr1	Fam46a	Pik3r1	Dusp2	Dscaml1	Casp4	Tnnt2	Myo10	Nfkbiz	Nr4a1	Rasgef1b	Hsf2	Skil	Rhob	Arl4d	Tcf7	Tcf4	Gm28707	Bmp2k	B930036N10Rik	Yes1
Module_5	Tm4sf5	Ccl6	Apol7c	Tubb2b	Tnni2	Idi1	Hmgcs1	Cd1d1	Fdps	Hspa5	Tnfrsf4	Glrx	2810474O19Rik	Pdcd1lg2	Tnfrsf18	Neat1	Sqle	Fam132a	Ptpn6	Msmo1	Lima1	Cacna1s	Atp2b1	Emp2	Tspan3	Ptcra	Fdft1	Apol10b	Tle3	Sc5d	Fam89a	Fam129c	Slc9a3r2	Il4i1	Snn	Gm37422	Nbl1	Acat2	Herpud1	Gpr137b	Osbpl3	Esam	Gpr137b-ps	Atf7ip	Myadm	Alg13	Plekhn1	Mir142hg	Aacs
Module_6	Serpinb1a	Bcl2l14	Irf8	Cd81	Rnaset2a	Ncoa7	Lactb	Gyg	AC125149.3	Ppdpf	Cst3	Prdx6	Txndc17	A530040E14Rik	Tmbim4	Serpinb6a	Chp1	Nudt9	Serpinb6b	Ndrg1	Smarce1	Tuba1a	Cox17	Tctex1d2	Bpnt1	Ece1	Gnb4	Hsd11b2	Coro2a	Pdlim4	Nostrin	Gnpda1	Arfgap3	Pfkp	Nagk	Plat	Rab26	Mpc1	Litaf	Polb	Zfp189	Slc25a3	Ift172	Atp5h	Pyhin1	Mthfd2	Gm10250	Pdrg1	Map4k5
Module_7	H2-M2	Hist1h1c	Khdc1a	Hist1h2bc	Cenpa	Nusap1	Pld4	Slc2a3	Usp18	Spc25	Fyb	Lmo4	Calr	Nrm	Tns3	Ncf4	Hmgb2	Mx1	Cd9	Phf11b	Glipr1	Sat1	Phf11a	Scn2b	Evi2a	Ighm	Eno3	Tgfb1	Mvd	Lmna	Apobec1	Cxcr4	H2afx	H2afz	Ppp1r14a	Tex9	Adgre5	Chst7	Unc93b1	Ramp1	Haus8	Ucp2	Ifi30	Fndc4	AF251705	Soat1	Eps8l1	Syne1	9130604C24Rik
Module_8	S100a10	Cryaa	AA467197	Sod3	Creb5	Rhoc	Tagln2	Anxa2	Csrp1	Cotl1	Calm1	Myl12a	Cd302	Coro1a	S100a11	Glipr2	Vwa5a	Gapdh	Nans	Anxa5	Txn1	Tpm4	Vasp	Tubb2a	Mrpl38	Nfkbib	Cfl1	Myl6	Tmsb10	Crip1	Tmpo	Lrrc58	Arhgef9	Abracl	Plp2	Dynll1	Mlf2	Cnn2	Hsp90ab1	Trak2	Srgn	Tspo	Bin1	Bcl2a1d	Gm9844	Ahsa2	Fah	Psme2b	Prr7
Module_9	Clu	Mt2	Mt1	Vim	Dap	Ltc4s	Cdkn2a	Sox4	Mrpl9	Trf	Calm5	Gm16685	Phlda3	Cd24a	Kif1a	Fbln5	Dstn	Cetn4	H1f0	Cstb	Rgs10	Cdkal1	Ifi27	Pik3ip1	App	Esd	Tubb6	Ndnl2	Zfos1	Aplp2	Smpdl3a	Gmfg	Gm9493	Ccng1	Pmvk	Med10	Rab9	Ypel3	Snhg6	Pkp3	Ankrd35	Ptma	Llph	Gm8730	Yeats2
Module_10	Dnase1l3	Pglyrp1	Mnda	Clec12a	Mpeg1	Psap	Grn	Mucl2	Aif1	Sgk1	Bcl2l11	Erdr1	Atr	Slc11a1	Krtcap3	Vcam1	Ptpn18	Chmp4c	Bst1	Fgd2	Tlr11	Gusb	Klf3	Gpc1	Slc8b1	2310030G06Rik	Ppt2	Cd52	Rbbp7	Pid1	1810043G02Rik	Fam126b	Pbx1	Gbp2b	Fxyd5	Mylip	Lsr	Pdia3	Sfxn5	Ccdc148	Rbm47	Mbnl2	BC051142	Zfp398
Module_11	Igfbp4	Crem	Csrp2	Gatsl3	Gpd2	Eprs	Flrt3	Got1	Lrrk2	Nrros	Gpr65	Dgat1	Vdr	Gcnt2	Mxi1	Lcp1	Ubash3b	Rnf157	Plek	Kcnq1	Thbs4	Lrrfip1	Vps37b	Nfil3	Itpr1	Map3k1	Traf4	Add3	Acsf3	Cdh23	Pcyt1a	Osm	Prkrir	S1pr1	Epb41	Map1b	Dusp3	Arhgef10	Prr5l	Tpra1	P4ha2	Prkar2a	Trim25
Module_12	Serpinb9b	Ier3	Myom1	Syt7	Ccer2	Mgl2	Serpina12	Skint4	Hsph1	Vwa3b	Rarres1	Cd207	Tcte2	Prps1	Txnrd1	Mtss1	Ndrg4	Hhat	Syt1	S100a16	Sncg	Calcb	Il31ra	Hba-a2	Rhof	Aox2	Hdc	Pla1a	Smox	Zbtb32	Serpinb12	Parp3	Ptpdc1	Tespa1	Stip1	Cnn3	Ndrg2	Zfp324	Slc35e1	Gm13561	Cyp7b1	Hebp1
Module_13	Cystm1	Scin	Ramp3	Ass1	Slc27a3	Gm13546	Casc1	Pkib	Gcsam	Tcea3	Stat4	Cytip	Tnfsf4	Klrk1	Dbn1	Uap1	Npr1	Pla2g7	Gls2	Ears2	Cd247	Dnajc12	Il1rn	Ctnna1	Tnfaip8	Ankrd36	Zyx	Plek2	Gng4	Gga2	Gm5424	Tpm1	C130026I21Rik	Ttll9	Isy1	Prkag2	Clasp2	1700024P16Rik	Plekhs1
Module_14	Timd4	Ceacam15	Tnfrsf9	Dpysl5	Ldoc1	Hsp90aa1	Alpk2	Aif1l	Anxa1	Bzw1	Acadm	Hacd3	Fdx1	Wfdc9	Ttc39c	Fars2	Ch25h	Plin2	Ccnd3	Il7r	Gorasp2	Hsd17b4	Il12rb2	Rdx	Cacybp	Gm9530	Samd9l	Hc	Ppa1	Fkbp1a	Trim46	Slc16a3	Serp1	Eea1	Suox	Pyurf	Denr	Havcr1	Cct3
Module_15	Car2	Fxyd2	Aldh1a2	Fcer1g	Rgs6	Cdh2	Slc7a11	Upb1	Capg	M1ap	Klrd1	Nrp2	Gsto1	Cd44	Gbp2	Adgre4	Zeb2	Aqp9	Ehf	Asrgl1	Blnk	Kctd12	Gm15987	Nedd4	Dhrs3	Sulf2	Rilpl2	Zeb2os	Ccdc28b	Nenf	Fam134b	Stom	Hnrnpa1	9130008F23Rik	Ggh	Il13ra1	Gm2115	Ccdc109b
Module_16	Lyz2	Apoe	Ifi205	Hsp90b1	Tgfbi	Cycs	Hcls1	Pdia6	Gsn	Cnp	Prdx5	Sdf2l1	Cd37	Cd48	Cdk2ap2	Tex30	Gng2	Nme1	Cyb5a	Hist3h2a	Ldha	Cep41	Gapt	Cd14	Plk1	Anxa6	Taldo1	Eif2ak2	Aldh2	Fhod1	Srsf2	Gar1	Svbp	P2ry12	Fkbp4	Il22ra2	Abcc5	Pla2g2d
Module_17	Pdcd1	Wfdc13	Kdm4a	Etnk2	Tcn2	Tinagl1	Spock1	Gem	Pop5	Sec24d	Hopx	Il1r2	Slc15a3	Ido1	Helz2	Ppfibp2	Gnptab	Epcam	Vgll4	Celf6	Asph	Nfkb1	Socs1	Casp6	Ddx18	Gal3st1	Atp10a	Cx3cl1	Tmem198b	Adrbk1	Osgin2	Dclre1a	Cacnb2	Dnajb2	Celf2
Module_18	Ptcd2	Stat1	Odc1	Rnf152	Tmem131	Map4k4	Stat3	Map3k14	Clgn	P2ry10	Klrb1b	Itpkb	Pxmp2	Foxn3	Egf	Ap3b1	B3gnt5	Dph5	Vav3	B4galt6	Ly75	Smim3	Cmtr1	Pde4d	Prelid2	Stbd1	Met	Mark3	Esyt1	Smchd1	Crlf3	Klre1	Ints3	Ceacam1	St6galnac6
Module_19	Ccl17	Ccl22	Hspa1a	Cd82	Mir155hg	Il27	Dll4	Cd40	Ebi3	Igsf8	Bcl2l1	Stxbp6	Jag1	Il18bp	Lgmn	Syn3	Actn1	Pou2f2	Syce1l	Klf7	Calcrl	Tdrd7	Lepr	Pvr	Actb	Wnk1	Nr2f6	Nfkbid	Rapgef6	Camk2d	Slc39a1	Flnb	Rgag4
Module_20	Tnip3	Ikzf4	Il2ra	Cd274	F11r	Ahnak	Sowahc	Tmem106a	Antxr2	Ktn1	Gpcpd1	Mapk3	Polr2l	Dusp5	Basp1	Snx16	Adam8	Gls	Rnf19b	Zc3h4	Plppr4	Fgfr1	Sfxn3	Lpcat1	Rac1	Kif21b	St3gal1	Serinc5	Ttc39b	Comt	Xlr3b
Module_21	Ly6e	Gm2a	Naaa	Ppt1	Ccr2	Xcr1	Cxcl9	Tlr3	Cadm1	BC028528	Amica1	Gm26740	Ffar4	Havcr2	Clec9a	Cd180	Mbnl1	Spint1	Kcnn4	Itgb7	Cd36	Mycl	2020-09-06	Pdlim2	Cd84	Ctps	Ms4a1
Module_22	Prg3	Prnp	Shisa5	Sh2d4a	Adm	Serpina3g	Grap	Spib	Nrg1	Arap2	Hap1	Fam111a	Ly86	Bhlhb9	Vegfa	Rab29	Dpp10	Cdc42ep2	St8sia1	Atp1a1	Rasal2	Nid1	Utp23	Metap1d	Gm10851	Sesn2
Module_23	Irf7	Ifit1	Rtp4	Mndal	Ifitm3	Ifi203	Rsad2	Axl	Fam26f	Bst2	Ifi204	Slfn2	Xaf1	Trim30a	Dck	Sp100	Lilra6	Parp14	Muc1	Xbp1	Pnp	Stat2	Daxx	Dnajc7
Module_24	Tpm2	Cd70	Serpinb9	Plscr1	Il6	Cd200	Cd86	Dusp14	Cd80	Rbpms2	Spata31d1b	Ehd1	Gm26532	Tgfb2	Lrp8	Rab8b	Htr7	Jup	Adprh	Ralb	Rassf5
[truncated: 21 more columns]
